# Supplementary material for: Local and macrocyclic (anti)aromaticity of porphyrinoids revealed by the topology of the induced magnetic field
Source: Royal Society of Chemistry journal article supplement (doi:10.1039/d0cp03272g), 2020-01-01

## LOCAL AND MACROCYCLIC (ANTI)AROMATICITY OF PORPHYRINOIDS REVEALED BY THE TOPOLOGY OF THE INDUCED MAGNETIC FIELD

Ricardo Pino-Rios<sup>a\*</sup>, Gloria Cárdenas-Jirón<sup>a</sup>, William Tiznado<sup>\*b</sup>

<sup>a</sup>Laboratorio de Química teórica, Facultad de Química y Biología. Universidad de Santiago de Chile (USACH) Av. Libertador Bernardo O'Higgins 3363, Santiago, Estación Central, Región Metropolitana, Chile; ricardo.pino@usach.cl

<sup>b</sup>Departamento de Química, Facultad de Ciencias Exactas. Universidad Andres Bello (UNAB). Av. República 275, Santiago, Región Metropolitana, Chile. wtiznado@unab.cl

### SUPPORTING INFORMATION

**Table S1.** Strengths of the magnetically induced currents (in nA.T<sup>-1</sup>) flowing around the macrocyclic ring (macroring), C=C and C-N-C bonds for porphyrin at the B3LYP/6-31g\*\* level.

| Rings | Macroring | C-N-C | C=C  |
|-------|-----------|-------|------|
| NH    | 27.1      | 8.5   | 18.6 |
| N     | 27.0      | 14.9  | 12.0 |

**Fig. S1.**  $B_{zz}^{\text{ind}}$  isosurfaces showing the bifurcation process of pyrrole. Isovalues are shown in parentheses.

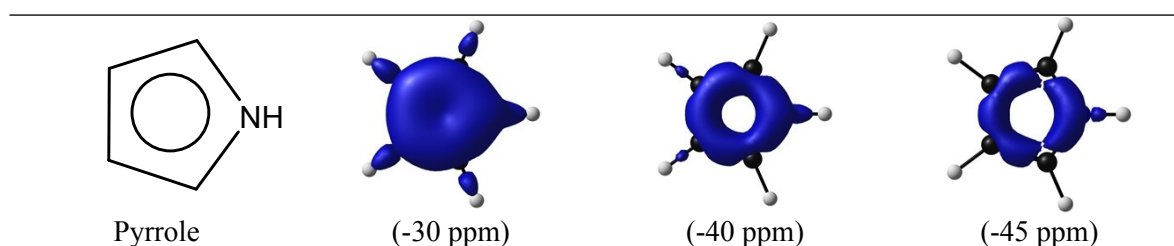

**Fig. S2.**  $B_{zz}^{\text{ind}}$  isosurfaces for azafulvene (a) and furan (b) at  $\pm 35$  ppm isovalue at the B3LYP/6-31g\*\* level. Global bifurcation values are showed in parenthesis.

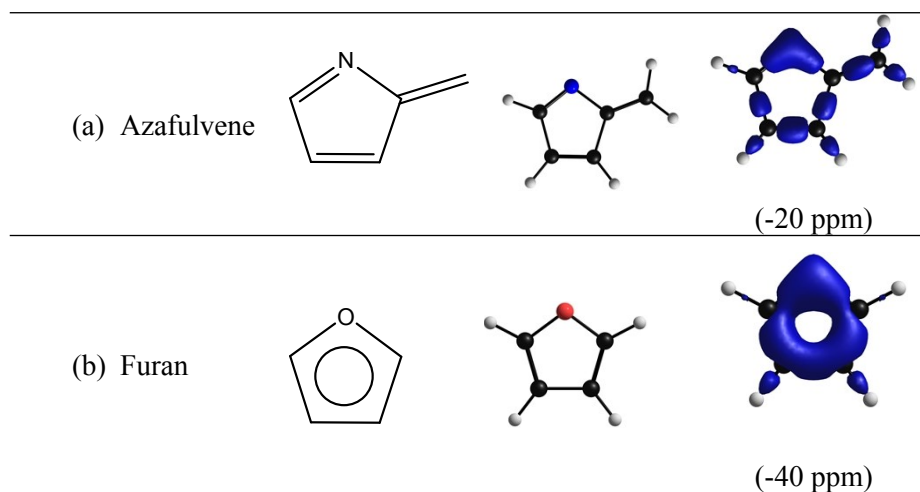

**Fig. S3.**  $B_{zz}^{\text{ind}}$  isosurfaces for non-planar porphyrinoids at  $\pm 35$ ,  $\pm 25$  and  $\pm 10$  respectively at B3LYP/6-31g\*\* level. Global bifurcation values are showed in parenthesis.

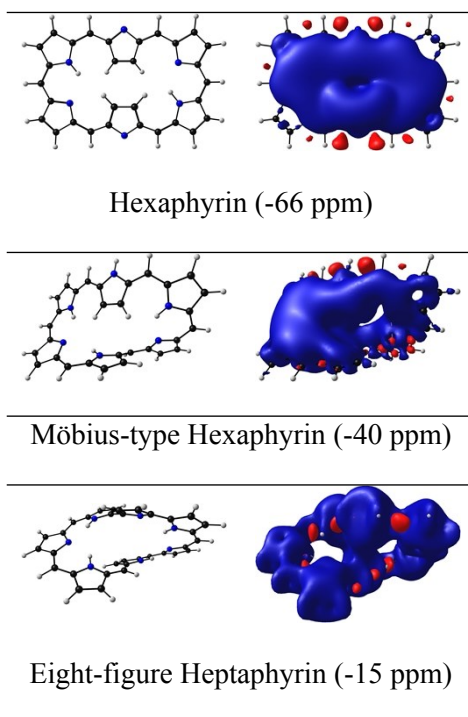

**Fig. S4.** Ring current strength (in nA.T<sup>-1</sup>) values for planar aromatic dihydrodideazaporphyrin (*left*) and; the hydrogenated dihydrodideazaporphyrin in *meso*-carbons (*right*).

### Dihydrodideazaporphyrin

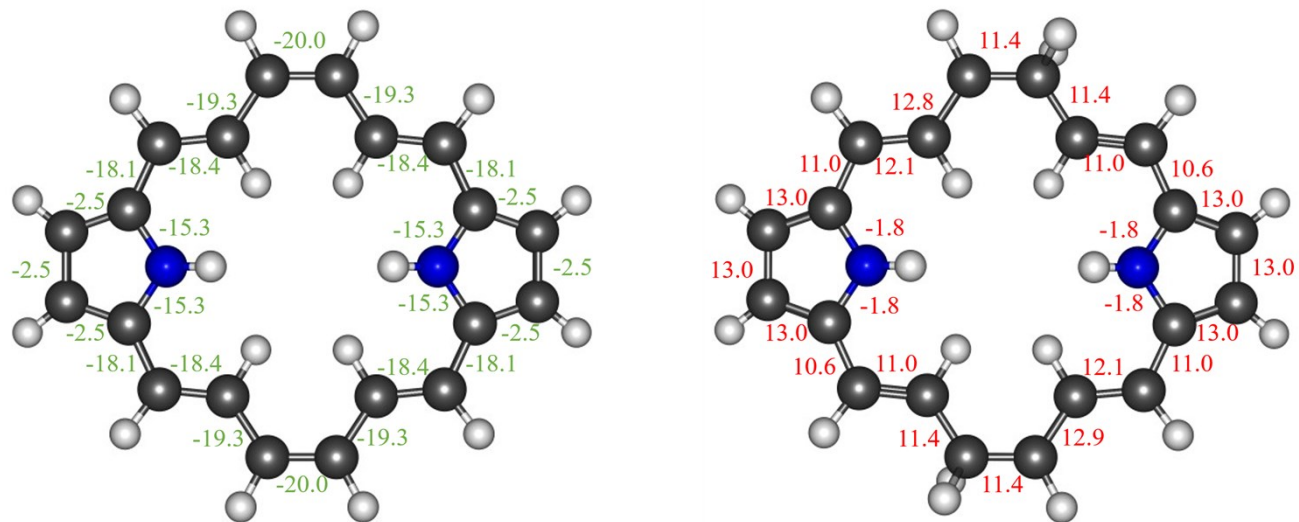



**Fig. S6.** (Continue) Ring current strength (in nA.T<sup>-1</sup>) values for planar aromatic porphyrinoids (See Fig 4 in manuscript).

### Sapphyrin

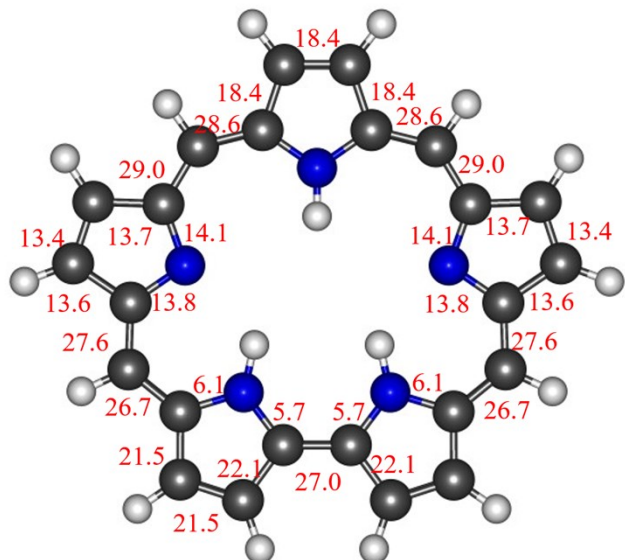

### Ozaphyrin

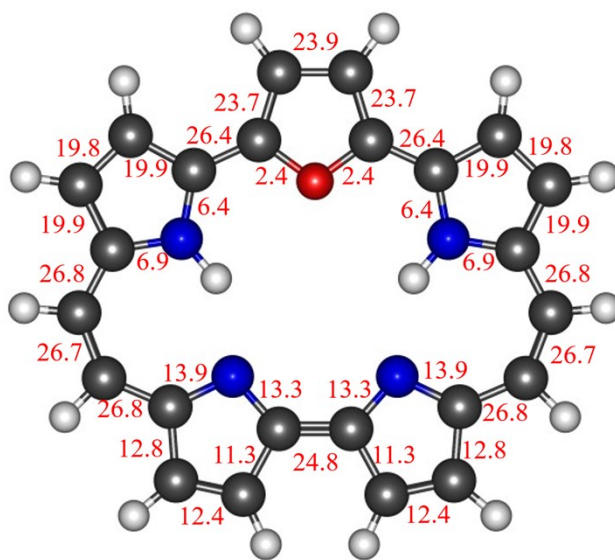

**Fig. S7.** Ring current strength (in nA.T<sup>-1</sup>) values for antiaromatic porphyrinoids (See Fig 3 and 5 in manuscript)

### Orangarin

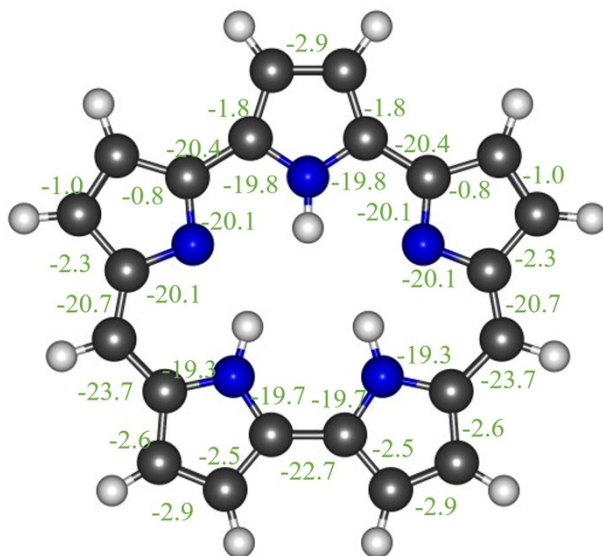

### Amethyrin

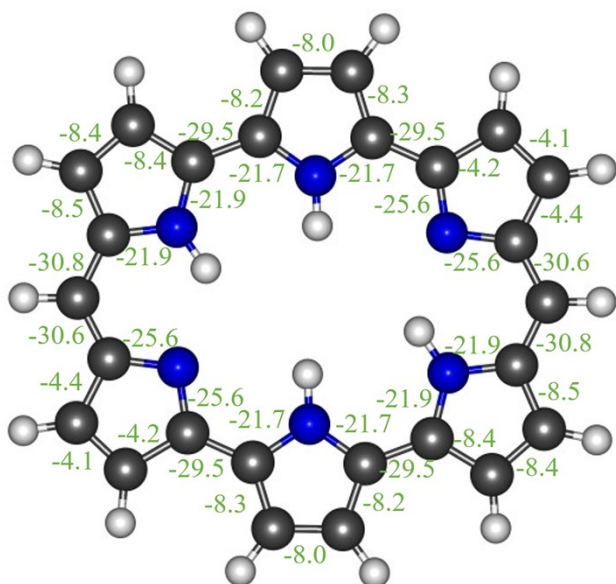

### [24]Pentaphyrin

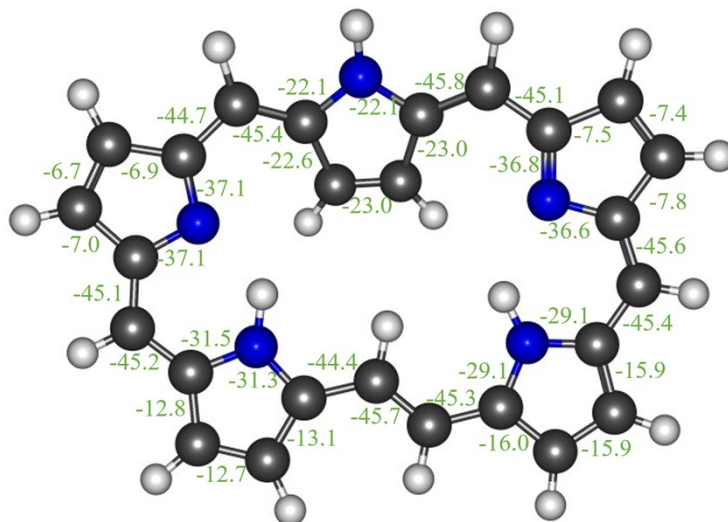

Supplement: d0cp03272g1.pdf [file d0cp03272g1.pdf]
